# Supplementary material for: Comparative insights into the role of oxygen vacancies in α-MnO 2 for activating peroxymonosulfate and peroxydisulfate
Source: Royal Society of Chemistry journal article supplement (doi:10.1039/d5qi02252e), 2026-01-01
Supplement: d5qi02252e1.pdf [file d5qi02252e1.pdf]

*Supporting Information*

**Comparative insights into the role of oxygen vacancies in  $\alpha$ -MnO<sub>2</sub>  
for activating peroxymonosulfate and peroxydisulfate**

*Qianwei Li<sup>a#</sup>, Daoqing Liu<sup>\*a#</sup>, Wei Yan<sup>a</sup>, Hao Liu<sup>a</sup>, Chunmao Chen<sup>a</sup>*

<sup>a</sup> State Key Laboratory of Heavy Oil Processing, China University of Petroleum, Beijing 102249,  
China

<sup>#</sup> Both authors contributed equally to this work.

<sup>\*</sup>To whom correspondence should be addressed:

[liudaoqing@cup.edu.cn](mailto:liudaoqing@cup.edu.cn) (D.Q.Liu)

## 11 **Supplementary Text, Figures, and Tables**

### 12 **Text S1. Batch experiment**

13 All solutions used in the experiments were prepared with deionized water. The reactions were  
14 carried out at room temperature with magnetic stirring at 600 rpm in a beaker. Before the  
15 reaction started, the catalyst (400 mg/L) was added to 50 mL of Acid Orange II (AO II) solution  
16 (0.1 mM) to ensure thorough dispersion. Then, 4 mM PDS or 0.13 mM PMS was added to  
17 initiate the reaction. At predetermined intervals, samples were taken and immediately filtered  
18 through a 0.45  $\mu\text{m}$  membrane. Subsequently, 0.5 mL of the filtrate was accurately mixed with  
19 0.5 mL of methanol (MeOH) to quench the degradation reaction. The initial pH of the reaction  
20 solution was adjusted using 1 mol/L  $\text{H}_2\text{SO}_4$  and 1 mol/L NaOH solutions.

21 Before concentration measurements, a standard calibration curve was established to ensure  
22 sample concentrations fell within the linear range. The concentration of AO II was determined  
23 by UV–Visible spectrophotometry (Thermo Scientific Nicolet 6700, USA). First, a 1 g/L AO II  
24 stock solution was diluted into a series of standard solutions with different concentrations. The  
25 absorbance of these standards was measured at the maximum absorption wavelength of 484 nm.  
26 A calibration curve was plotted with AO II concentration on the x-axis and absorbance (A) on  
27 the y-axis, yielding a linear regression equation. During measurements, the background  
28 absorbance of the blank electrolyte was subtracted from all absorbance data to calculate the  
29 corresponding AO II concentration. Each experiment was repeated at least three times, and the  
30 average values were reported.

31 This study employed two spin-trapping agents: 5,5-dimethyl-1-pyrroline N-oxide (DMPO,  
32 >99%, Sigma-Aldrich) and 2,2,6,6-tetramethyl-4-piperidinol (TEMP, >99%, Sigma-Aldrich), to  
33 capture radicals and singlet oxygen generated during the reactions. Specifically, DMPO and  
34 TEMP were separately dissolved in phosphate buffer solution at pH 7.4, with final  
35 concentrations of 80 mM and 50 mM, respectively. Then, 1 mL of sample was taken from the  $\alpha$ -  
36  $\text{MnO}_2$ /PDS reaction system (containing 40 mM DMPO or 25 mM TEMP, catalyst at 400 mg/L,  
37 PDS at 4 mM or FFA at 100  $\mu\text{M}$ ), and filtered through a 0.45  $\mu\text{m}$  membrane. Finally, a small  
38 amount of the resulting mixture was drawn into a quartz capillary tube and subjected to EPR  
39 analysis to detect the spin-trapped adducts.

## 40 Text S2. Electrochemical Analysis

### 41 (1) Preparation of carbon-coated glassy carbon electrode

42 A catalyst-coated glassy carbon electrode was prepared by dipping a glassy carbon electrode  
43 (GCE) into a solution. Before the dipping process, the glassy carbon electrode was polished with  
44 alumina powder. To obtain a homogeneous ink, 5 mg of the  $\alpha$ -MnO<sub>2</sub> material was dispersed in 1  
45 mL of a Nafion-containing solution (comprising 150  $\mu$ L of isopropanol, 800  $\mu$ L of ultrapure  
46 water, and 500  $\mu$ L of a 5 wt.% Nafion solution) under ultrasonication for 1 h. A working  
47 electrode was prepared by dipping 8  $\mu$ L of the catalyst into a glassy carbon electrode (5 mm in  
48 diameter) and drying at ambient temperature (25°C) for 6 hours. The working electrode was  
49 activated by cyclic voltammetry (CV) cycling between 0 and 1.0 V (vs. RHE) at a scan rate of 10  
50 mV s<sup>-1</sup> in 0.1 M Na<sub>2</sub>SO<sub>4</sub> solution to obtain a stable voltammogram.

### 51 (2) Analytical methods for electrochemically active specific surface area (ECSA)

52 The ECSA was estimated by measuring the capacitive current associated with double-layer  
53 charging from the scan-rate dependence of cyclic voltammograms (CVs). All ECSA tests were  
54 conducted in a 0.1 M Na<sub>2</sub>SO<sub>4</sub> electrolyte using a three-electrode cell with a Pt plate serving as  
55 the counter electrode, Ag/AgCl as the reference electrode, and the as-prepared catalyst-modified  
56 electrode as the working electrode. The potential window of CVs was 0.6–0.7 V vs. RHE, and  
57 the scan rates were 20, 40, 60, 80, and 100 mV s<sup>-1</sup>. The double-layer capacitances ( $C_{dl}$ ) of  
58 various samples were determined from the CVs, which are expected to be linearly proportional  
59 to the effective surface area. The double-layer capacitance was estimated by plotting the  $\Delta J =$   
60  $J_a - J_c$  (i.e., the difference of the anode current density  $J_a$  and cathode current density  $J_c$ ) at 0.65  
61 V vs. SCE against the scan rate. The linear slope is equivalent to twice the double-layer  
62 capacitance  $C_{dl}$ , which can be used to represent the electrochemical active surface area <sup>1</sup>.

### 63 (2) Potential conversion

64 The measured potentials can be converted to the corresponding potentials of the reversible  
65 hydrogen electrode through the formula  $E_{RHE} = E_{SCE} + 0.242 + 0.0591 \cdot \text{pH}$ .

66

67

68

69

## 70 Text S3. DFT Method

71 All density functional theory (DFT) calculations were carried out using the Vienna *Ab initio*  
72 Simulation Package (VASP) <sup>2, 3</sup>. The exchange–correlation effects were treated with the  
73 generalized gradient approximation (GGA) in the Perdew-Burke-Ernzerhof (PBE) formalism <sup>4</sup>.  
74 The interaction between core and valence electrons was described by the projector augmented  
75 wave (PAW) method <sup>5</sup>. A plane-wave cutoff energy of 400 eV was employed for all calculations,  
76 and the Brillouin zone was sampled using a 3×2×1 Monkhorst-Pack *k*-point mesh. The electronic  
77 self-consistency and ionic relaxation were converged to 1.0×10<sup>-5</sup> eV in total energy and 0.05 eV  
78 Å<sup>-1</sup> in residual forces, respectively. Long-range van der Waals interactions were included using  
79 the DFT-D3 dispersion correction scheme <sup>6</sup>. Structural models and charge/geometry analyses  
80 were visualized using the VESTA software package <sup>7</sup>.

81 The adsorption energy ( $E_{\text{ads}}$ ) of species A on the catalyst surface was evaluated as:

82 
$$E_{\text{ads}} = E_{\text{A}^*} - E_{\text{A}} - E_{\text{sub}}$$

83 where  $E_{\text{A}^*}$  is the total energy of the adsorbed system,  $E_{\text{A}}$  is the energy of the isolated A molecule,  
84 and  $E_{\text{sub}}$  is the energy of the clean substrate.

85

86

87

88 **HRTEM images of ultrasound-treated  $\alpha$ -MnO<sub>2</sub>**

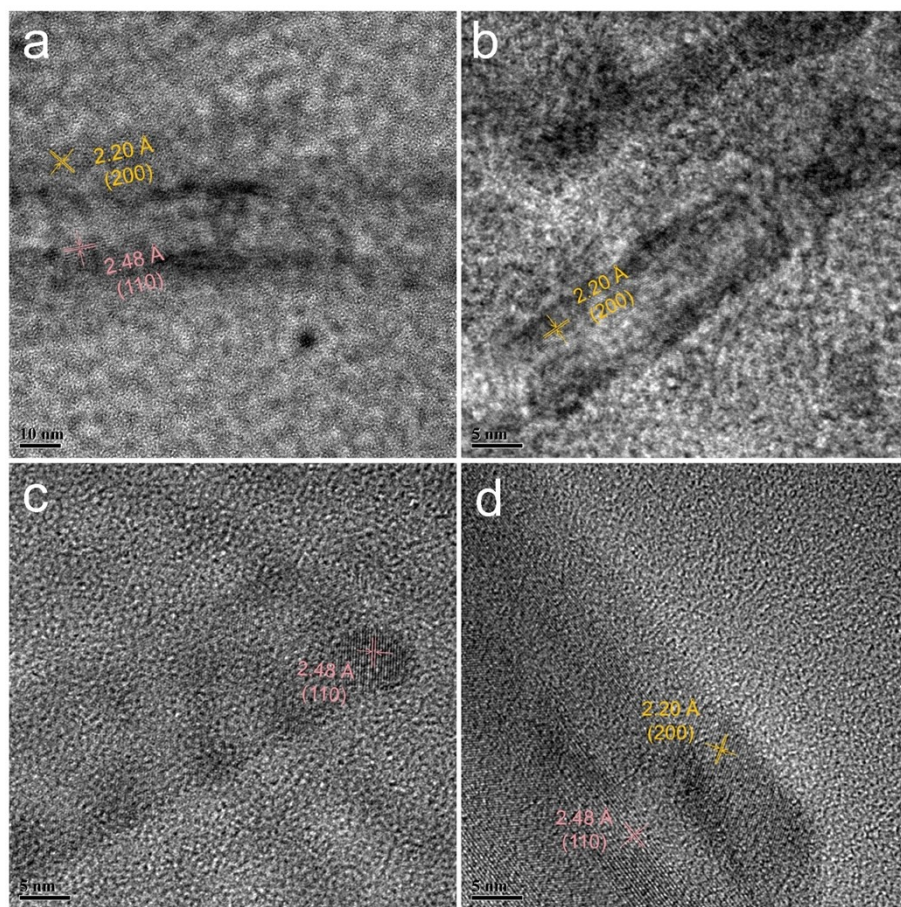

89

90 **Fig. S1.** HRTEM images and (a–d) of  $\alpha$ -MnO<sub>2</sub>,  $\alpha$ -MnO<sub>2</sub>-OV-0.5,  $\alpha$ -MnO<sub>2</sub>-OV-1, and  $\alpha$ -MnO<sub>2</sub>-  
91 OV-3.

92

93 **Summary of XPS data for ultrasound-treated  $\alpha$ -MnO<sub>2</sub>**

94 **Table S1.** XPS data for ultrasound-treated  $\alpha$ -MnO<sub>2</sub> with different conditions.

| Sample                             | Mn (%)           |                  |                  |                                    | O (%)             |                  |                                      | AOS<br>(Mn) |
|------------------------------------|------------------|------------------|------------------|------------------------------------|-------------------|------------------|--------------------------------------|-------------|
|                                    | Mn <sup>2+</sup> | Mn <sup>3+</sup> | Mn <sup>4+</sup> | Mn <sup>3+</sup> /Mn <sup>4+</sup> | O <sub>latt</sub> | O <sub>ads</sub> | O <sub>latt</sub> / O <sub>ads</sub> |             |
| $\alpha$ -MnO <sub>2</sub>         | 6.49             | 39.86            | 53.66            | 0.743                              | 66.96             | 26.88            | 2.49                                 | 3.62        |
| $\alpha$ -MnO <sub>2</sub> -OV-0.5 | 4.32             | 51.24            | 44.44            | 1.15                               | 60.51             | 31.75            | 1.91                                 | 3.54        |
| $\alpha$ -MnO <sub>2</sub> -OV-1   | 3.52             | 55.38            | 41.10            | 1.35                               | 55.58             | 36.5             | 1.52                                 | 3.52        |
| $\alpha$ -MnO <sub>2</sub> -OV-3   | 3.77             | 59.55            | 36.68            | 1.62                               | 48.32             | 33.46            | 1.44                                 | 3.48        |

95

96

97 **Adsorption of AO II by the  $\alpha$ -MnO<sub>2</sub>**

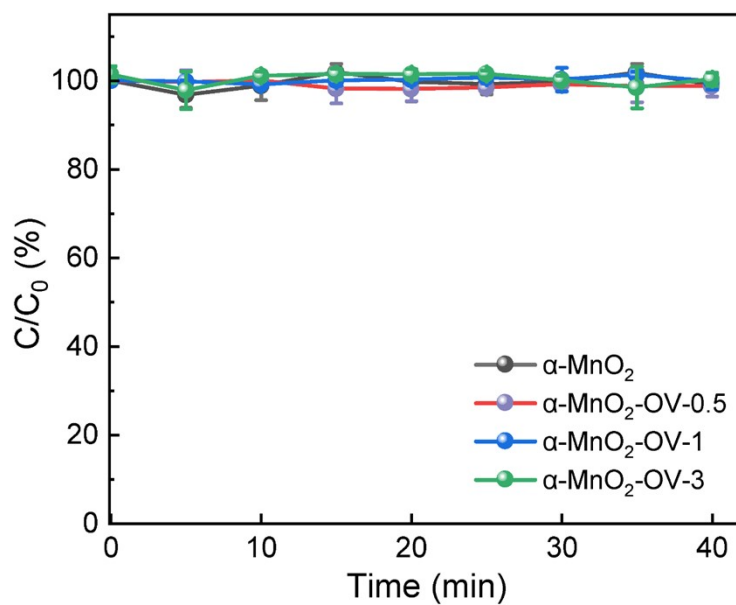

98

99 **Fig. S2.** Adsorption of performance AO II by  $\alpha$ -MnO<sub>2</sub>,  $\alpha$ -MnO<sub>2</sub>-OV-0.5,  $\alpha$ -MnO<sub>2</sub>-OV-1, and  $\alpha$ -  
100 MnO<sub>2</sub>-OV-3.

101

102

103 **Degradation of AO II by the  $\alpha$ -MnO<sub>2</sub>/PMS system with radical**  
104 **scavengers**

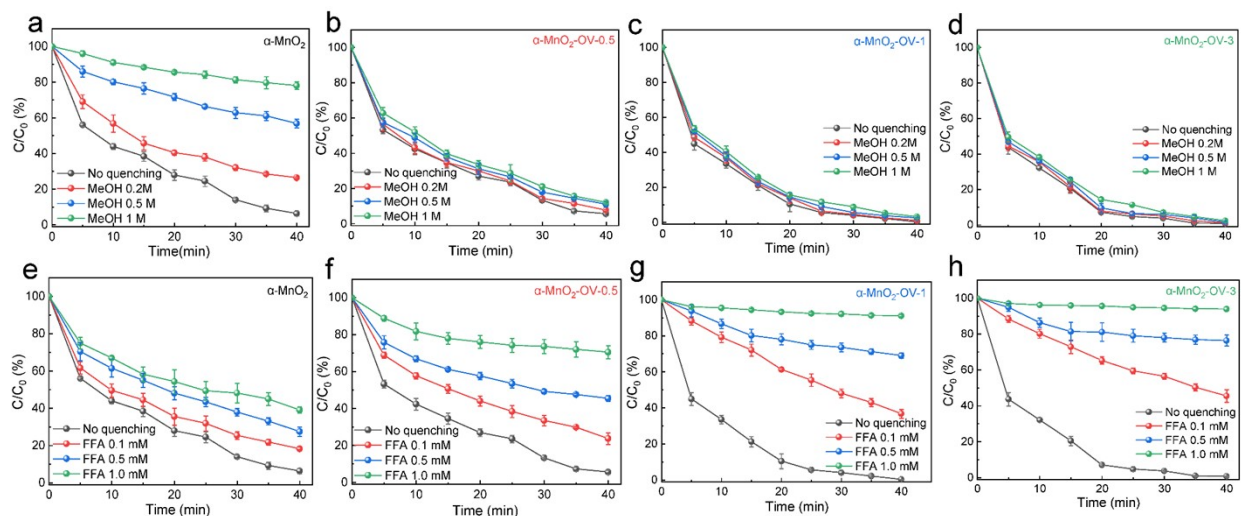

105  
106 **Fig. S3.** Degradation of AO II by the  $\alpha$ -MnO<sub>2</sub>/PMS system in the presence of methanol (a–d)  
107 and FFA (e–h) as radical scavengers. ([AO II]<sub>0</sub> = 0.1 mM, [Material] = 400 mg/L, [PMS] = 0.13  
108 mM, pH ≈ 7.0)

109

## 110 Effect of ultrasound on ECSA of $\alpha$ -MnO<sub>2</sub>

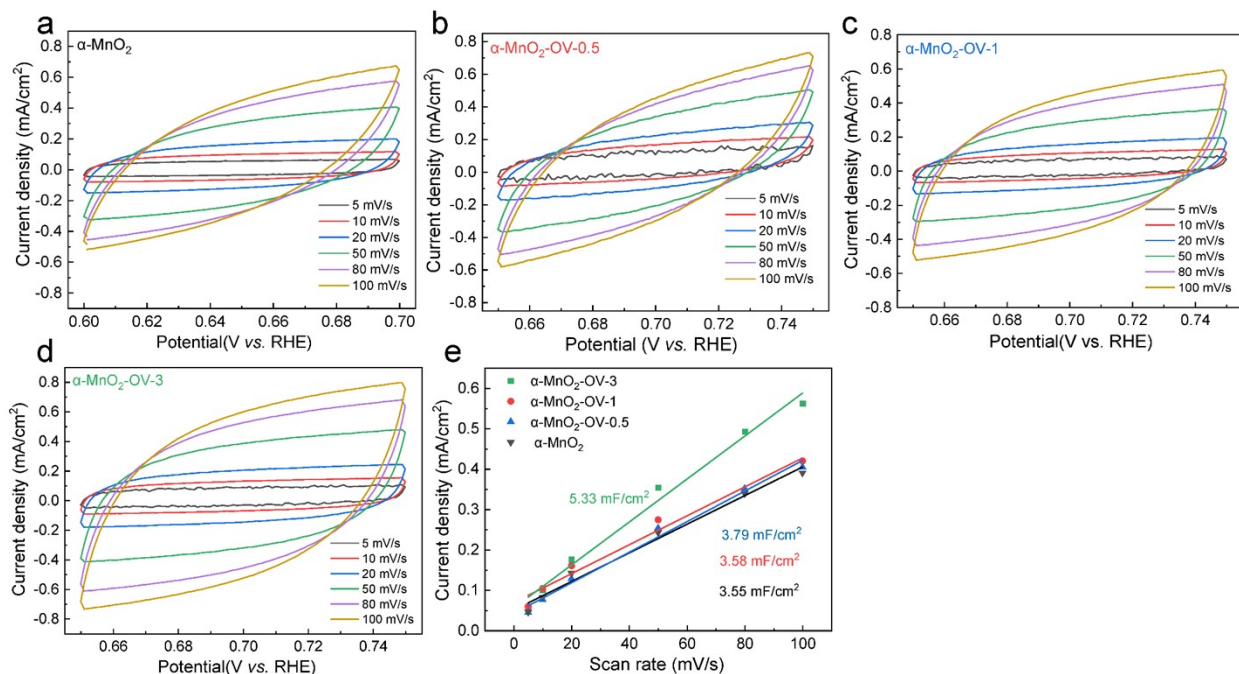

111  
 112 **Fig. S4.** CV curves of (a)  $\alpha$ -MnO<sub>2</sub> (b)  $\alpha$ -MnO<sub>2</sub>-OV-0.5, (c)  $\alpha$ -MnO<sub>2</sub>-OV-1, (d)  $\alpha$ -MnO<sub>2</sub>-OV-3, at  
 113 different scan rates, and (e) ECSA measurements of samples based on the double-layer  
 114 capacitance over a range of scan rates.

115

# 116 Effect of aeration on PMS activation by $\alpha$ -MnO<sub>2</sub>-OV-1

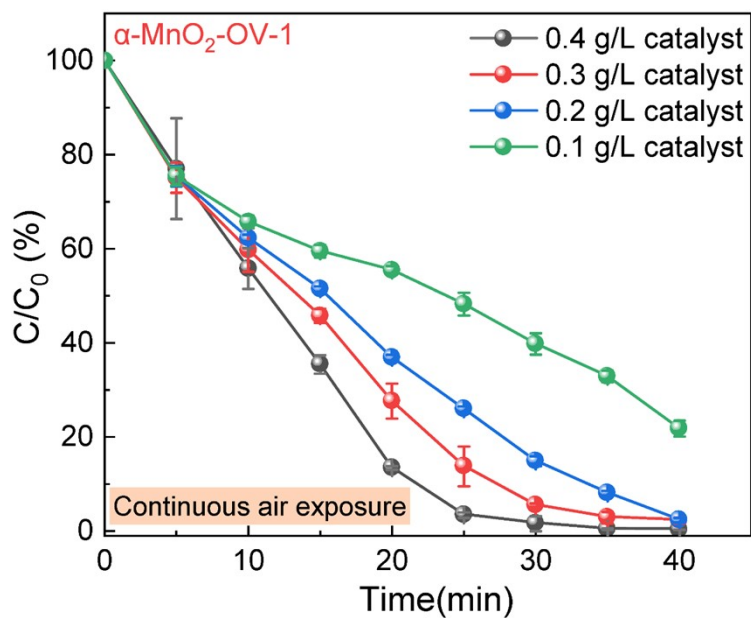

117

118 **Fig. S5.** Degradation performance of  $\alpha$ -MnO<sub>2</sub>-OV-1 under continuous air exposure conditions  
 119 (air flow rate: 200 mL/min, [AO II]<sub>0</sub> = 0.1 mM, [Material] = 400 mg/L, [PMS] = 0.13 mM,  
 120 pH ≈ 7.0)

122 **XPS spectra of the  $\alpha$ -MnO<sub>2</sub>-OV-1 after being used for PMS activation**

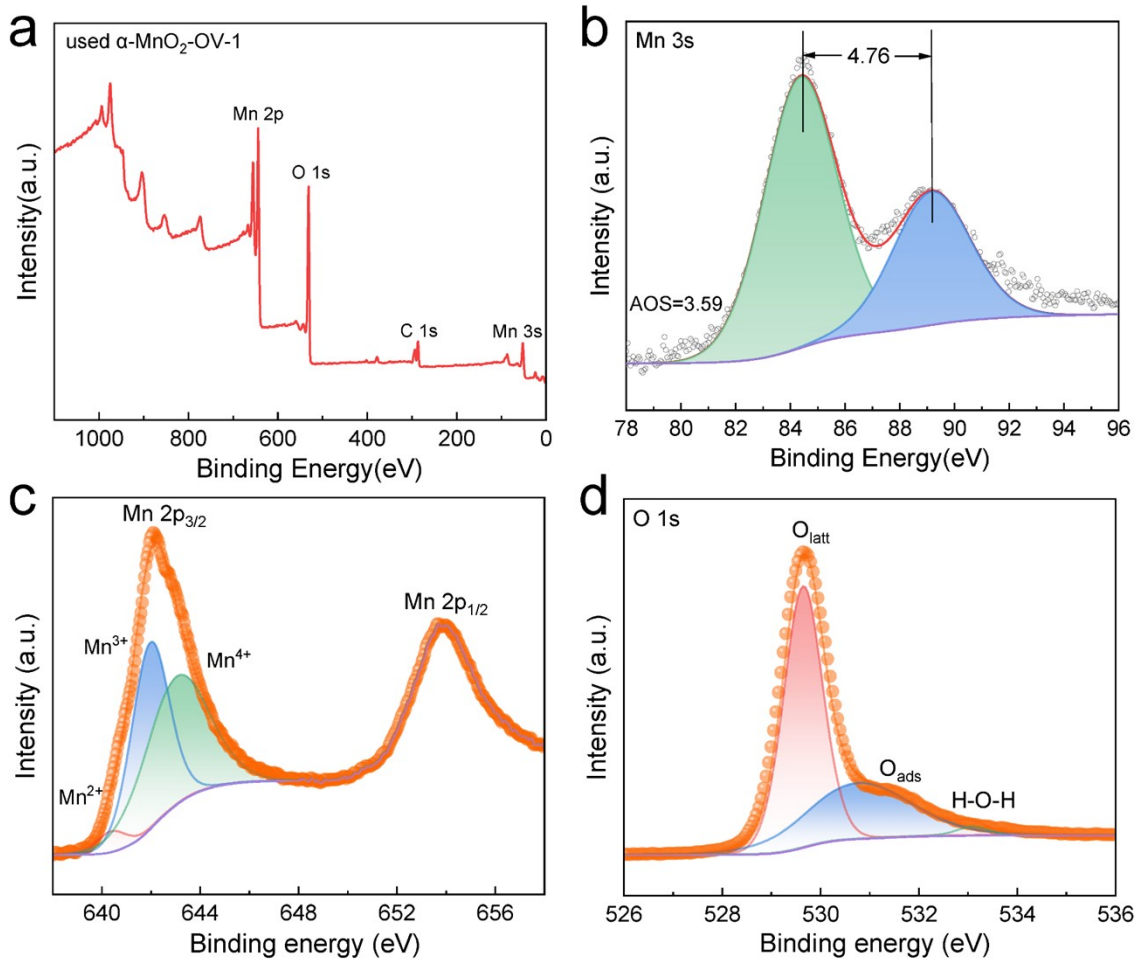

123  
124 **Fig. S6.** XPS spectra for survey spectra (a), Mn 3s (b), Mn 2p<sub>3/2</sub> (c), O 1s (d), of the  $\alpha$ -MnO<sub>2</sub>-  
125 OV-1 after being used for PMS activation.

126  
127 **Table S2.** XPS data for ultrasound-treated  $\alpha$ -MnO<sub>2</sub>-OV-1 after being used for PMS activation.

| Sample                                | Mn (%)           |                  |                  |                                         | O (%)             |                  |                                         | AOS<br>(Mn<br>) |
|---------------------------------------|------------------|------------------|------------------|-----------------------------------------|-------------------|------------------|-----------------------------------------|-----------------|
|                                       | Mn <sup>2+</sup> | Mn <sup>3+</sup> | Mn <sup>4+</sup> | Mn <sup>3+</sup> /Mn <sup>4+</sup><br>+ | O <sub>latt</sub> | O <sub>ads</sub> | O <sub>latt</sub> /<br>O <sub>ads</sub> |                 |
| Used $\alpha$ -MnO <sub>2</sub> -OV-1 | 3.68             | 44.45            | 51.86            | 0.857                                   | 62.73             | 35.68            | 1.75                                    | 3.59            |

128

129 **DFT calculation of PDS and PMS adsorption on the MnO<sub>2</sub> (200)**

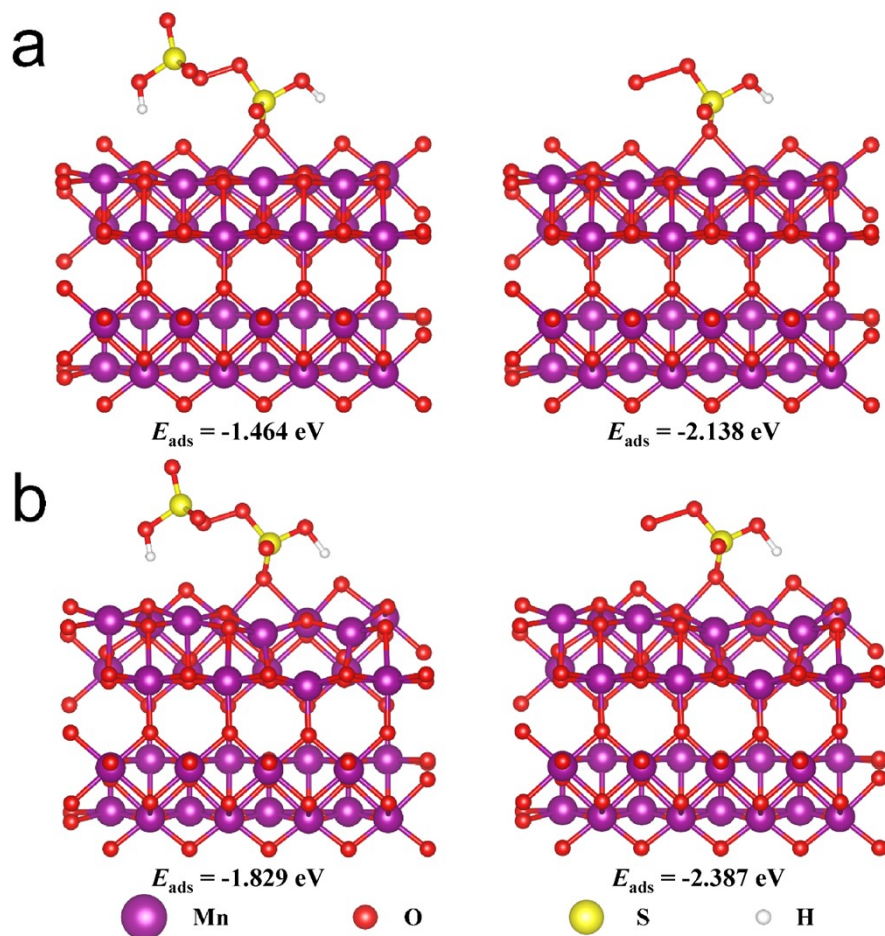

130

131 **Fig. S7.** DFT calculation of PDS or PMS adsorption on the MnO<sub>2</sub> (200) with (a) one and (b)  
 132 three oxygen vacancies.

133

134

## 135 Reference

- 136 1. D. Liu, Y. Zhou, B. Wei, Q. Li and H. Zhao, Analyzing the active sites of carbocatalyst  
137 for peroxydisulfate activation: Specific surface area or electrochemical surface area?,  
138 *Chemosphere*, 2024, **364**, 143124.
- 139 2. G. Kresse and J. Hafner, Ab initio molecular dynamics for open-shell transition metals,  
140 *Phys Rev B*, 1993, **48**, 13115-13118.
- 141 3. G. Kresse and J. Furthmüller, Efficient iterative schemes for ab initio total-energy  
142 calculations using a plane-wave basis set, *Phys Rev B*, 1996, **54**, 11169-11186.
- 143 4. J. P. Perdew, K. Burke and M. Ernzerhof, Generalized Gradient Approximation Made  
144 Simple, *Phys Rev Lett*, 1996, **77**, 3865-3868.
- 145 5. G. Kresse and D. Joubert, From ultrasoft pseudopotentials to the projector augmented-  
146 wave method, *Phys Rev B*, 1999, **59**, 1758-1775.
- 147 6. S. Grimme, J. Antony, S. Ehrlich and H. Krieg, A consistent and accurate ab initio  
148 parametrization of density functional dispersion correction (DFT-D) for the 94 elements  
149 H-Pu, *J. Chem. Phys.*, 2010, **132**.
- 150 7. K. Momma and F. Izumi, VESTA 3 for three-dimensional visualization of crystal,  
151 volumetric and morphology data, *J Appl Crystallogr*, 2011, **44**, 1272-1276.
- 152
